# Supplementary material for: Development and application of multiplex PCR for the rapid identification of four Fusarium spp. associated with Fusarium crown rot in wheat
Source: PeerJ journal article supplement (doi:10.7717/peerj.17656), 2024-06-27
Supplement: Raw_data.pdf [file Raw_data.pdf]

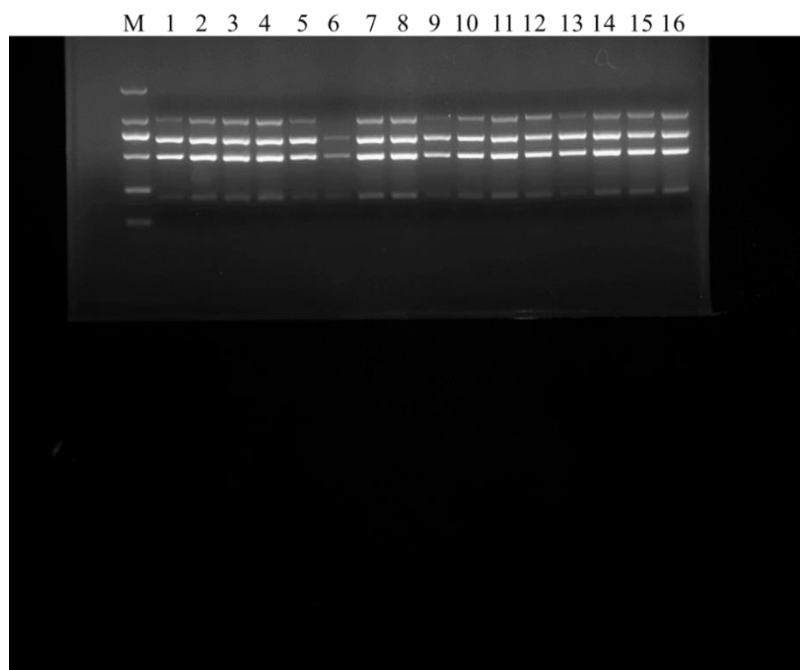

Figure 2A

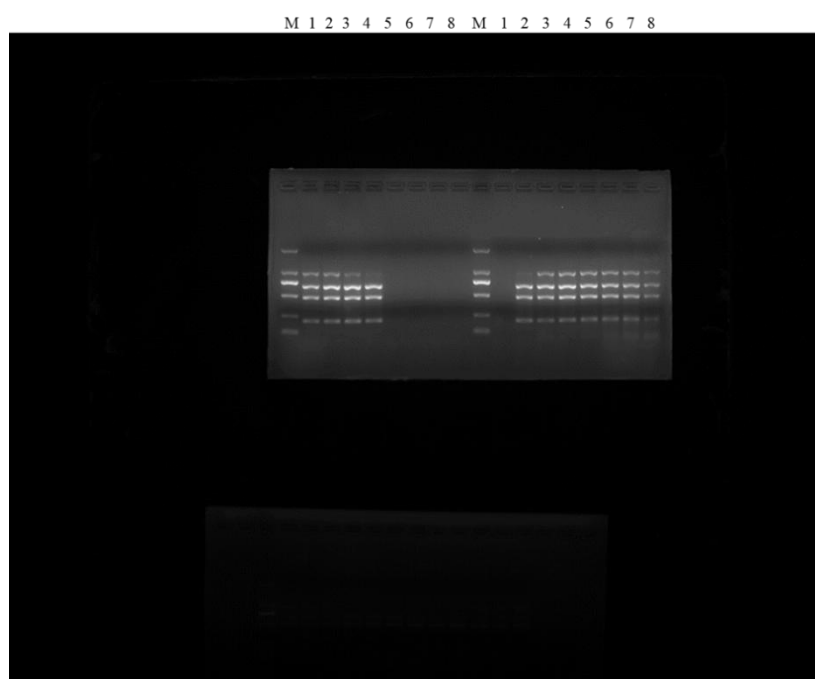

Figure 2B. Right and Figure 2C. Left.

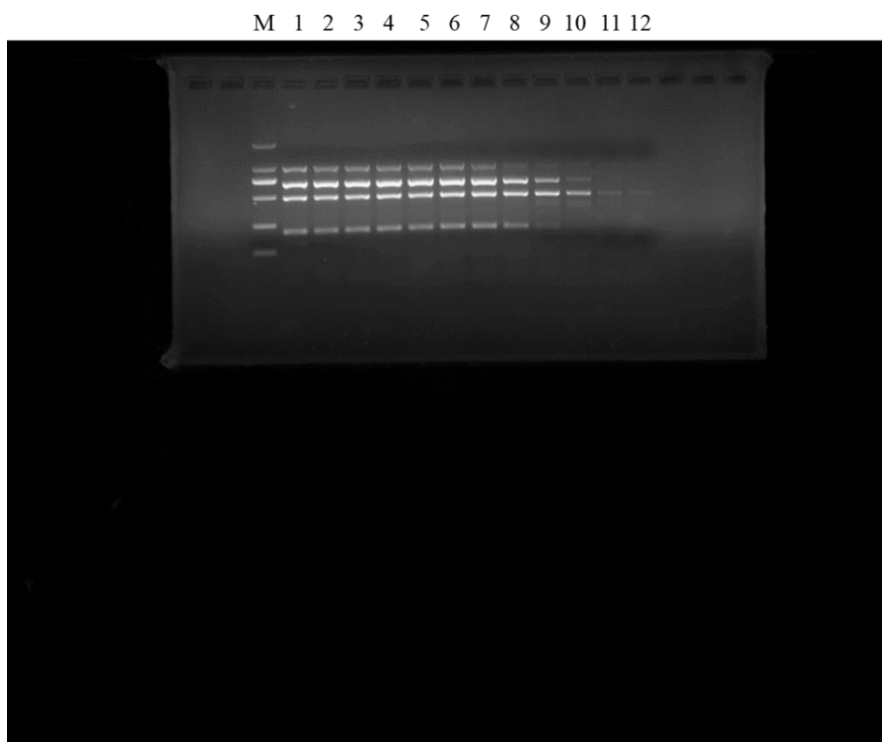

Figure 2D

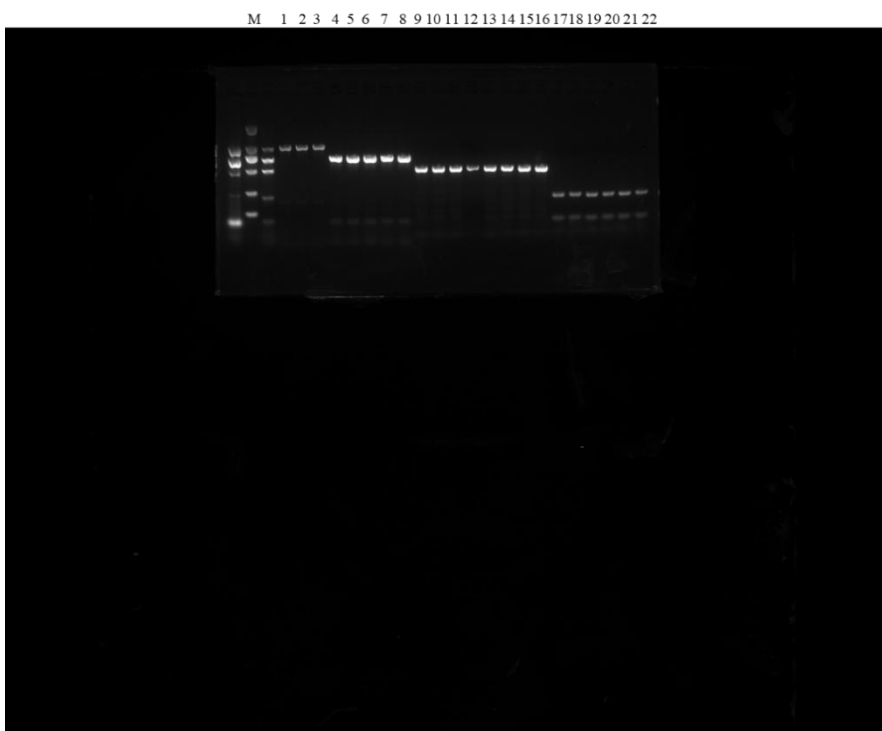

Figure 3

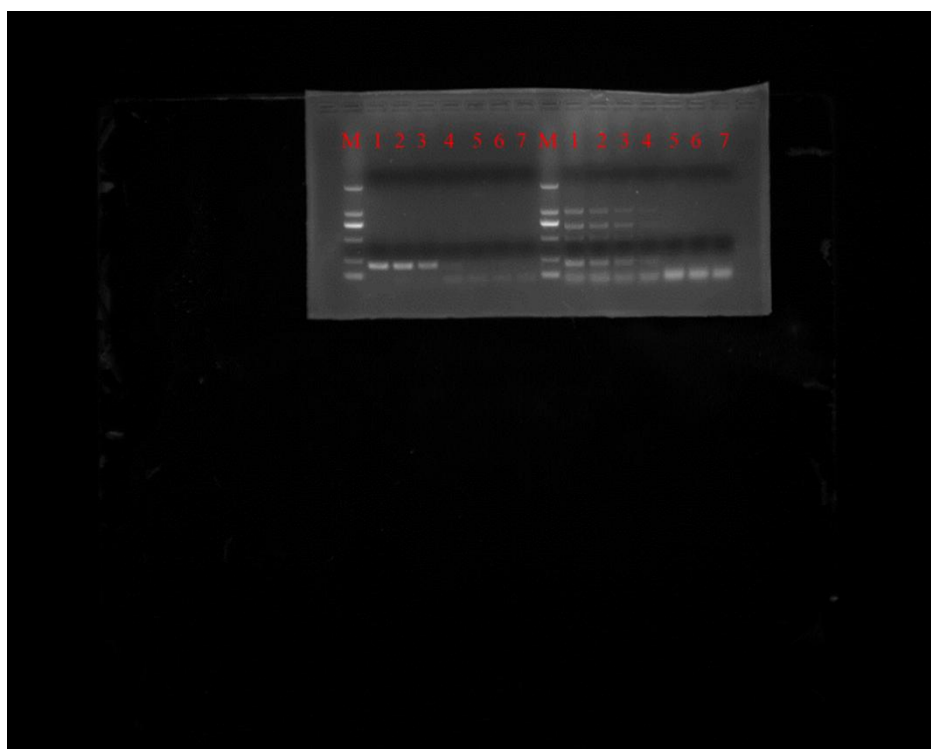

Figure 4A Right and Figure 4E Left

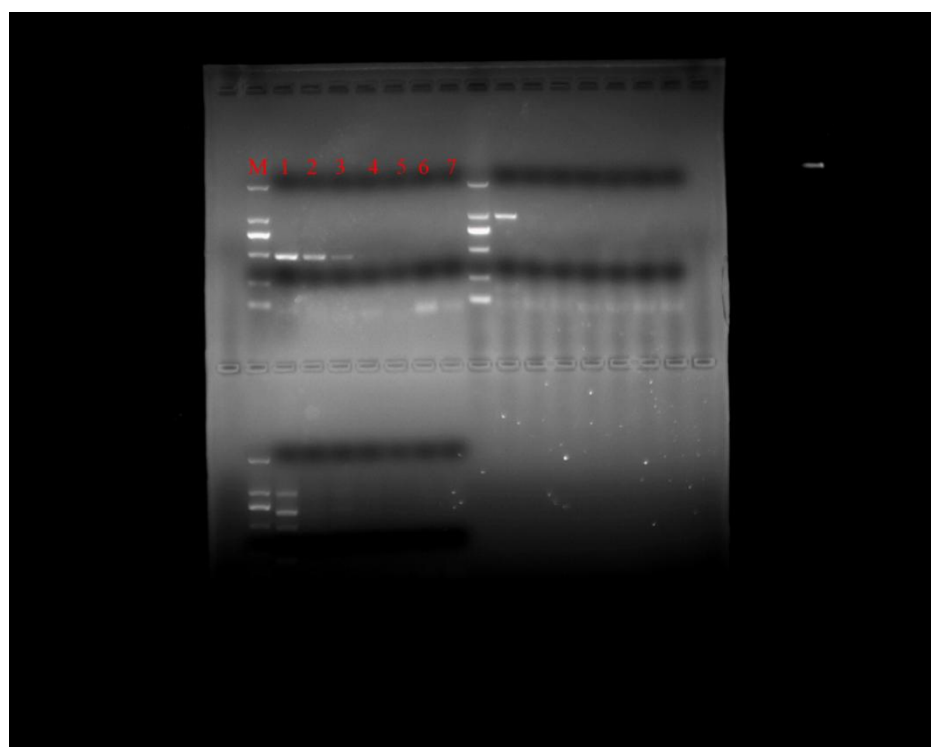

Figure 4D

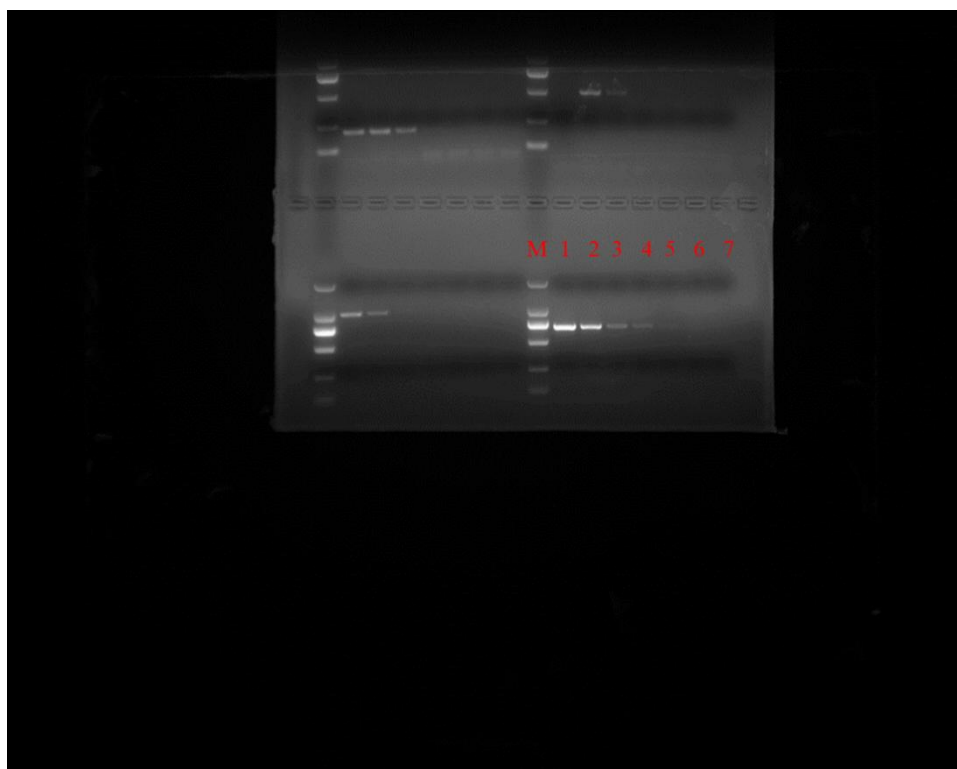

Figure 4C

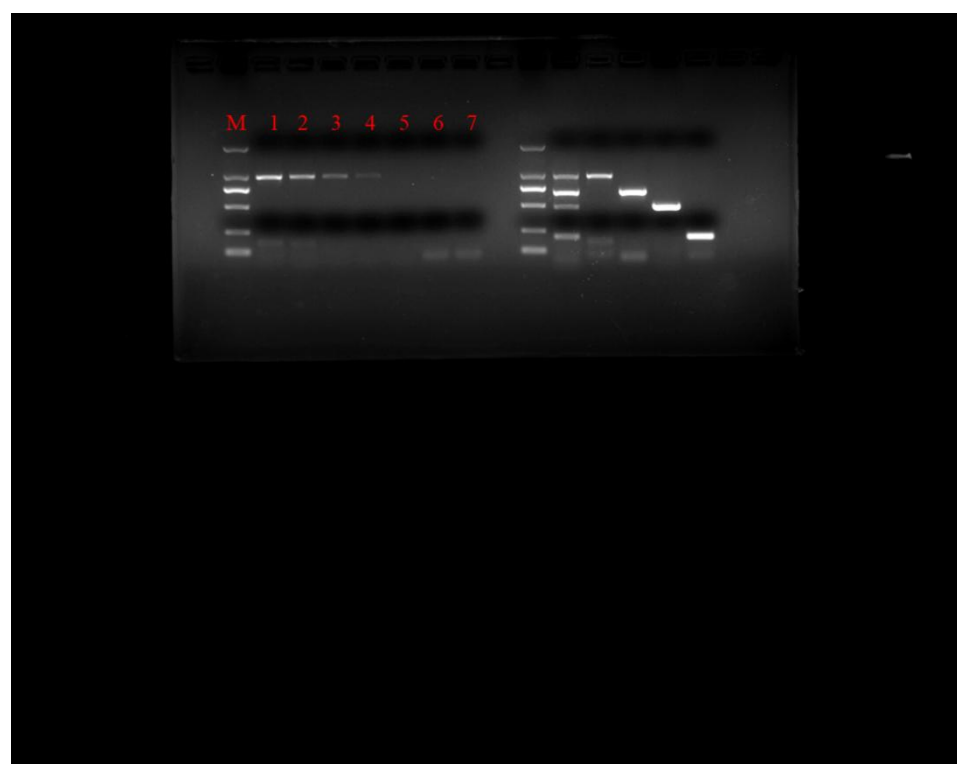

Figure 4B

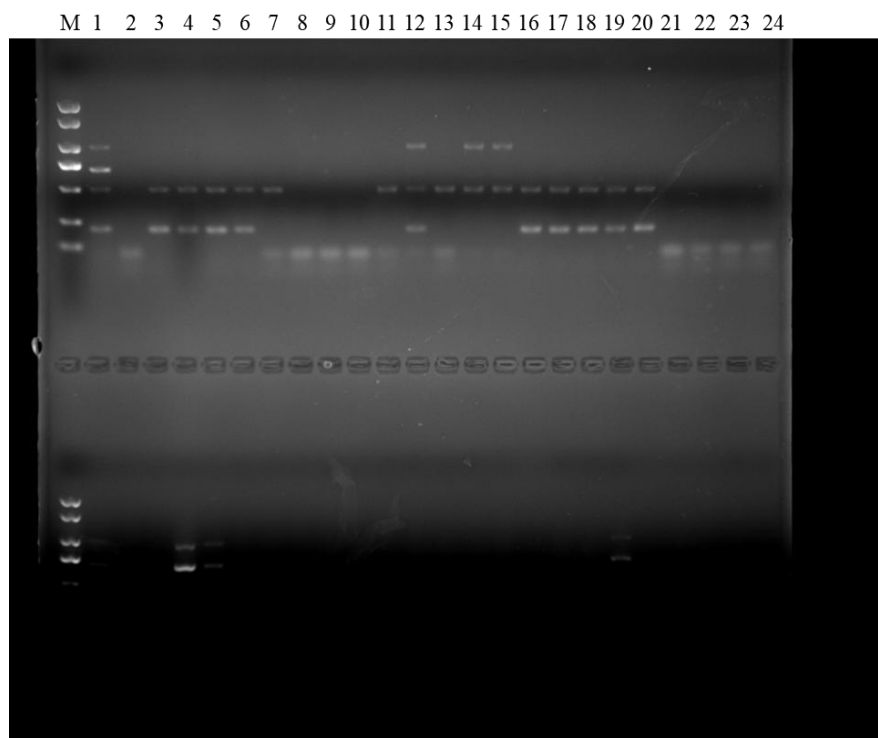

Figure 5A

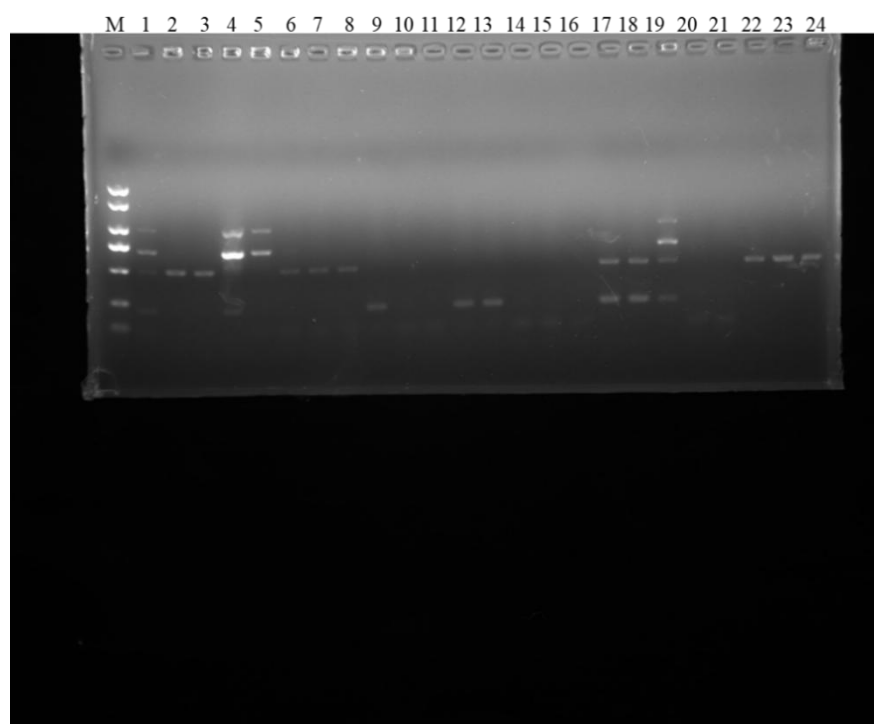

Figure 5B

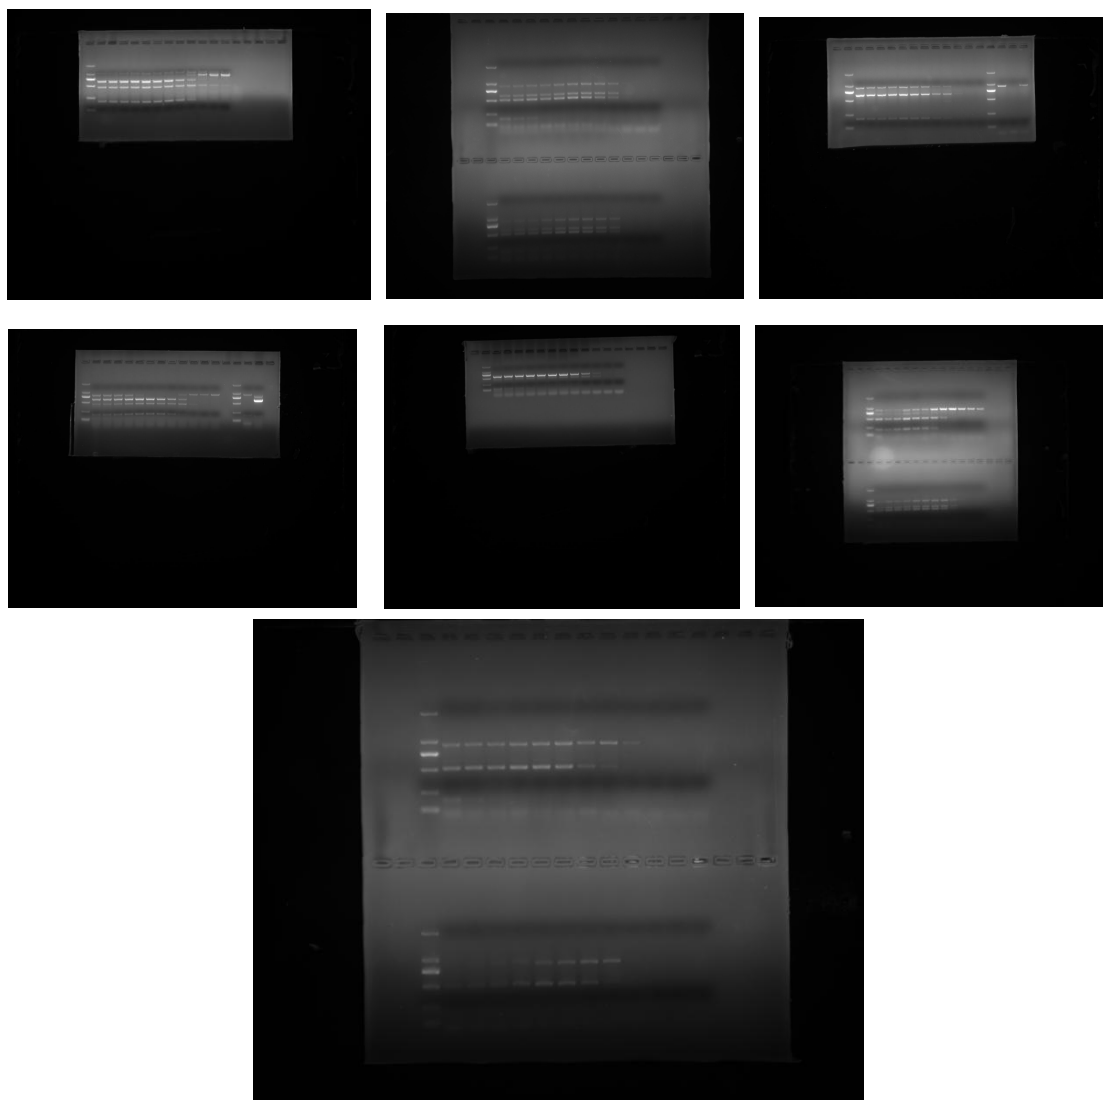

Figure S1

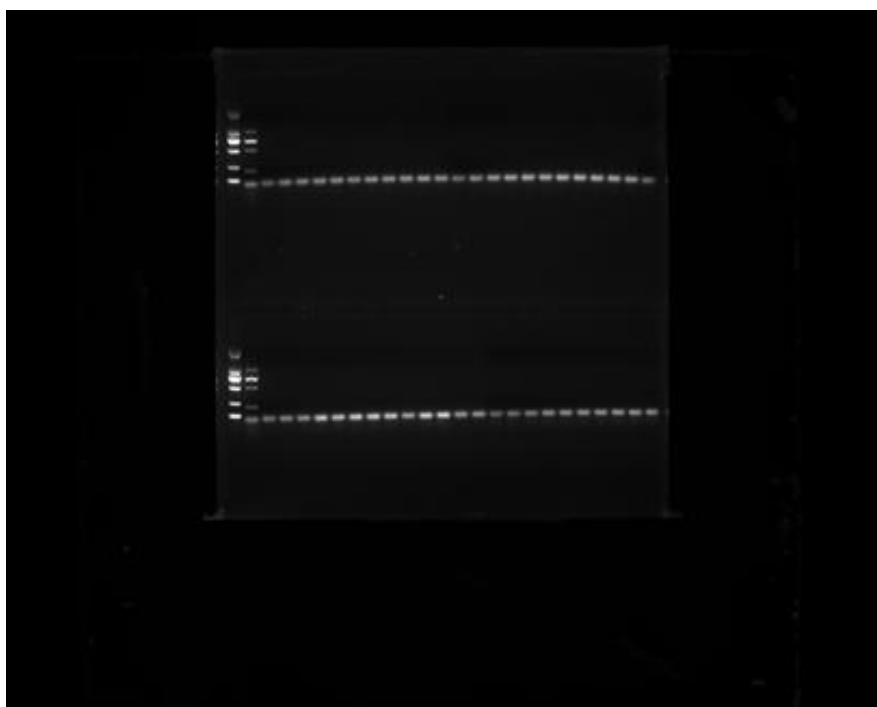

Figure S2

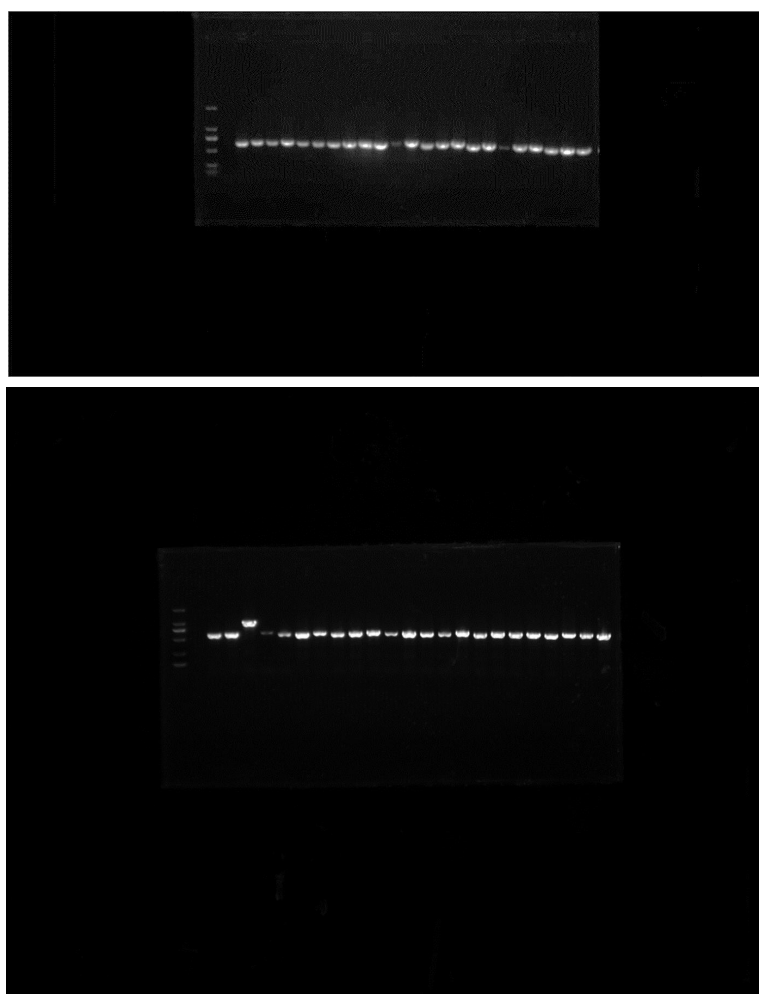

Figure S3

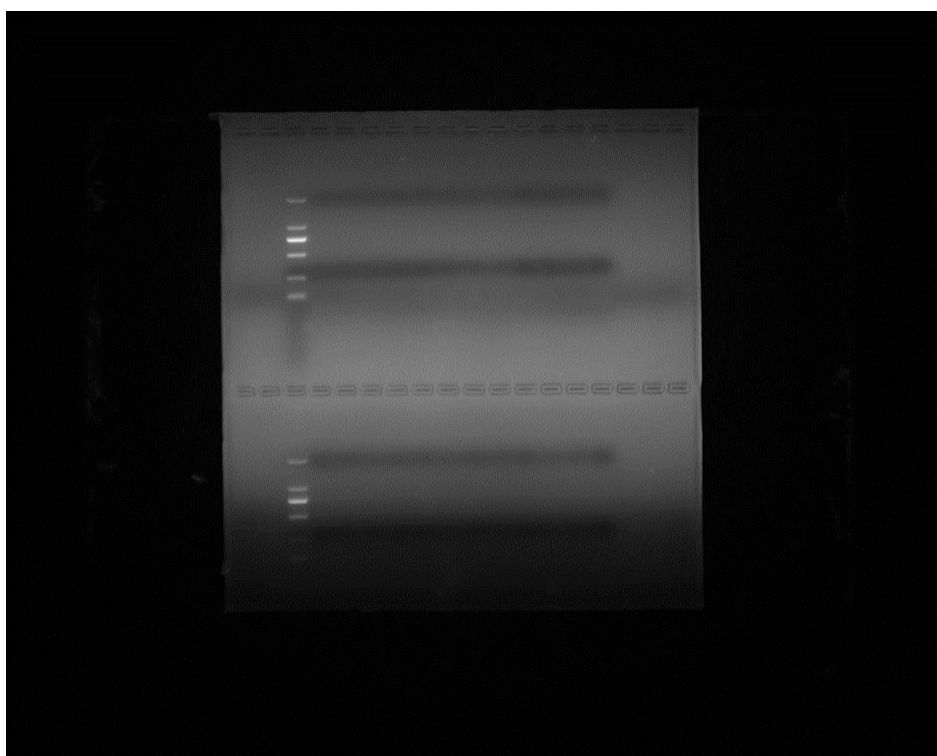

Figure S4
